# Supplementary material
Source: ML conference proceedings conference paper supplement (https://openreview.net/forum?id=MrJoBgN1VO)
Supplement: supplementary_material [file benchexample.pdf › GeoGramBench_Code/figures/benchexample.pdf]

## Primitive Recognition

**Problem:** In  $\triangle ABC$ , suppose  $\angle C = 3\angle A$ ,  $a = 27$ , and  $c = 48$ . What is the value of  $b$ ?

[asy]

```
pair A=origin, B=(14,0),
    C=(10,6);
draw(A--B--C--cycle);
label("$A$", A, SW);
label("$B$", B, SE);
label("$C$", C, N);
```

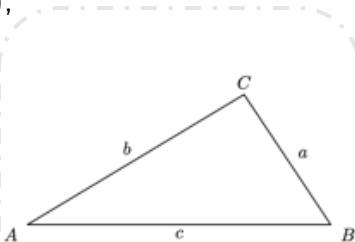

...  
[/asy]

visualize

**Answer:** 35

**Problem:** Older television screens have an aspect ratio of 4 : 3, meaning the width is to the height as 4 is to 3 ...

[asy]

```
filldraw((0,0)--(8,0)
--(8,1)--(0,1)
--cycle, grey, black);
filldraw((0,5)
--(8,5)--(8,1)
--(8,5)
--(0,5)
--cycle, grey, black);
```

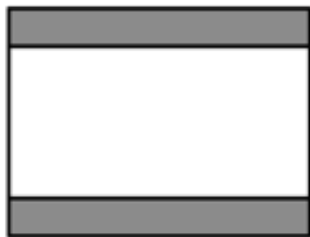

visualize

**Answer:** 2.7

## Local Relation Composition

**Problem:** Let  $\triangle ABC$  have area 240 . Points  $X$  ,  $Y$  , and  $Z$  ...such that  $\frac{AX}{BX} = 3$  ,  $\frac{BY}{CY} = 4$  and  $\frac{CZ}{AZ} = 5$  . Find the area of  $\triangle XYZ$  .

[asy]

```
pair A=(0,15),B=(0,-5),C=(25,0.5),X=origin,
```

```
...
label("$A$",A,N);
label("$B$",B,S);
label("$C$",C,E);
```

...  
[/asy]

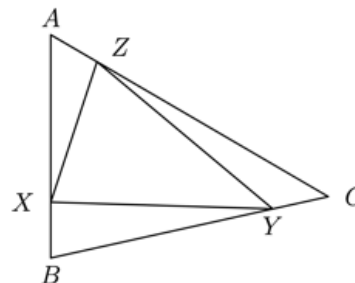

visualize

**Answer:** 122

**Problem:** Square  $ABCD$  has side length 4, and  $M$  is the midpoint of  $\overline{CD}$  ... What is the distance from  $P$  to  $\overline{AD}$ ?

[asy]

```
draw(Circle((2,0),2));
draw(Circle((0,4),4));
filldraw(Circle((2,0),
0.07));
```

```
...
label("$M$", (2,0), S);
label("$P$", (3.6, 1.4), N);
```

[/asy]

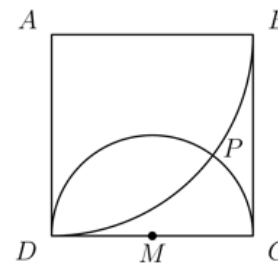

visualize

**Answer:**  $\frac{16}{5}$

## Global Abstract Integration

**Problem:** The pattern in the figure below continues inward infinitely. The base of the largest triangle is 1 , ...Find the total shaded area.

[asy]

```
pen blu = rgb(0,112,191);
real r=sqrt(3);
fill((8,0)--(0,8r)--(-8,0)
--cycle, blu);
fill((0,0)--(4,4r)--(-4,4r)
--cycle, white);
```

...  
[/asy]

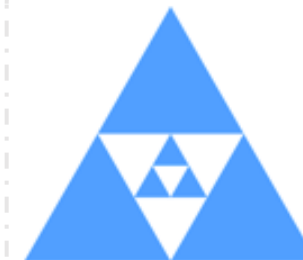

visualize

**Answer:**  $\frac{\sqrt{3}}{5}$

**Problem:** The centers of the faces of the right rectangular prism shown below are connected to form an octahedron. What is the volume of this octahedron?

[asy]

```
draw((0,0,0)--(0,0,3),
dashed);
draw((0,0,0)--(0,4,0),
dashed);
draw((0,0,0)--(5,0,0),
```

...  
[/asy]

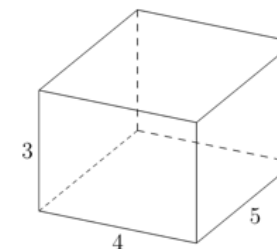

visualize

**Answer:** 10
